# Supplementary material
Source: PubMed Central journal article supplement (PMC5803367)

### Online figures caption:

Figure 1. (A) 1.4 cm CLM in segment 2/3 near the left portal vein. (B) Microwave ablation using a Neuwave PR probe. (C) Contrast-enhanced CT at 8 weeks following MWA shows ablation defect measuring 2.8 x 1.9 cm without any radiological evidence of residual disease. (D, E, F) Follow up imaging with CECT at 5 months, 1 year and 1.5 years shows continuous involution of the ablation defect consistent with successful treatment.

Figure 2. Example of ablative margin measurement in a 56-year old woman with a 2.3-cm CLM in segment 2. (A) Axial portal venous phase CT image shows the tumor before RFA; distances 1, 2, 3 and 4 were measured from the edges of the tumor to the chosen landmarks. (B) Axial portal venous phase CT image obtained 7 weeks after RFA shows the ablation defect; the same distances 1, 2, 3, and 4 were measured from the edge of the ablation defect to the same landmarks. The corresponding distances were subtracted, and the smallest value was chosen as the minimal margin—that is, distance 4 ( $76.0 \text{ mm} - 73.3 \text{ mm} = 2.7 \text{ mm}$ ).

Se: 2  
Im: 61  
PS: SYSTEM

A

SI  
R

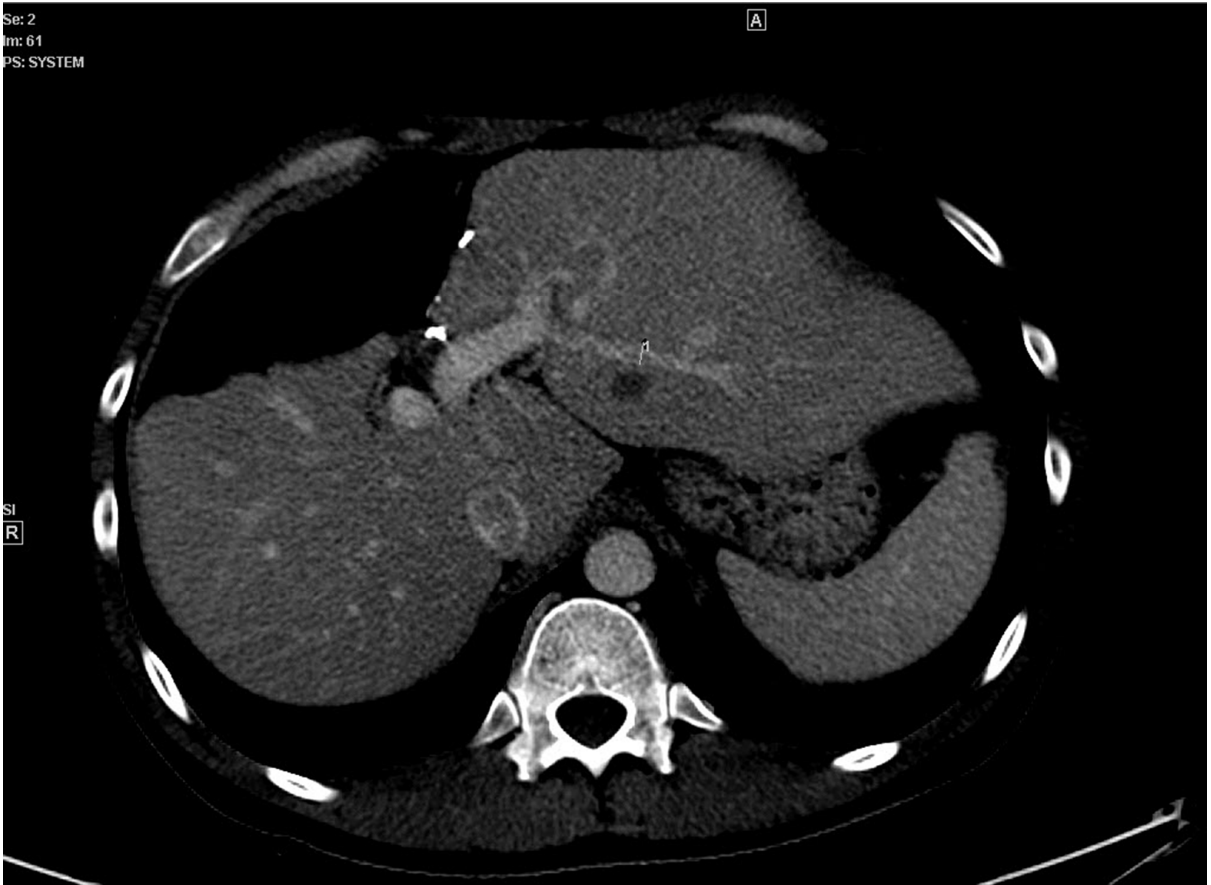

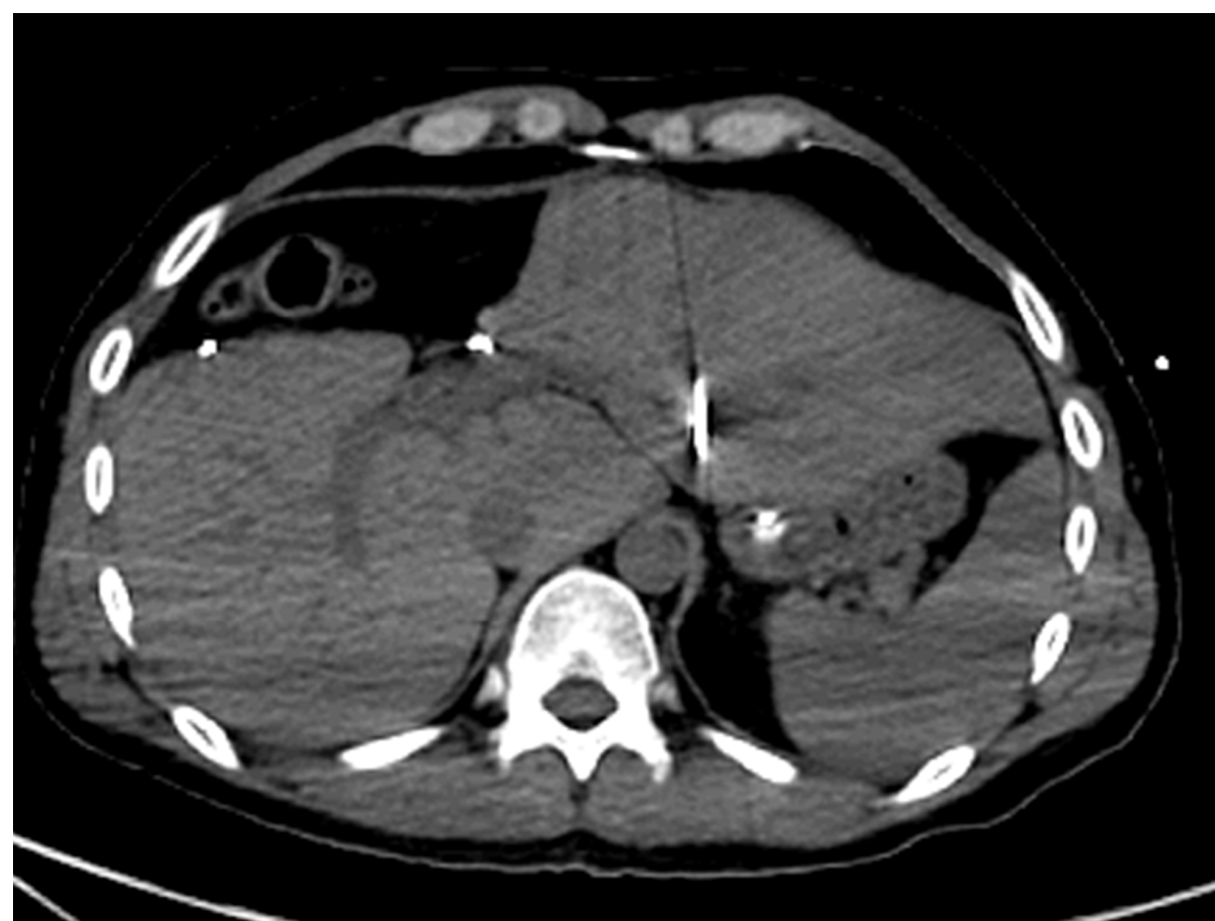

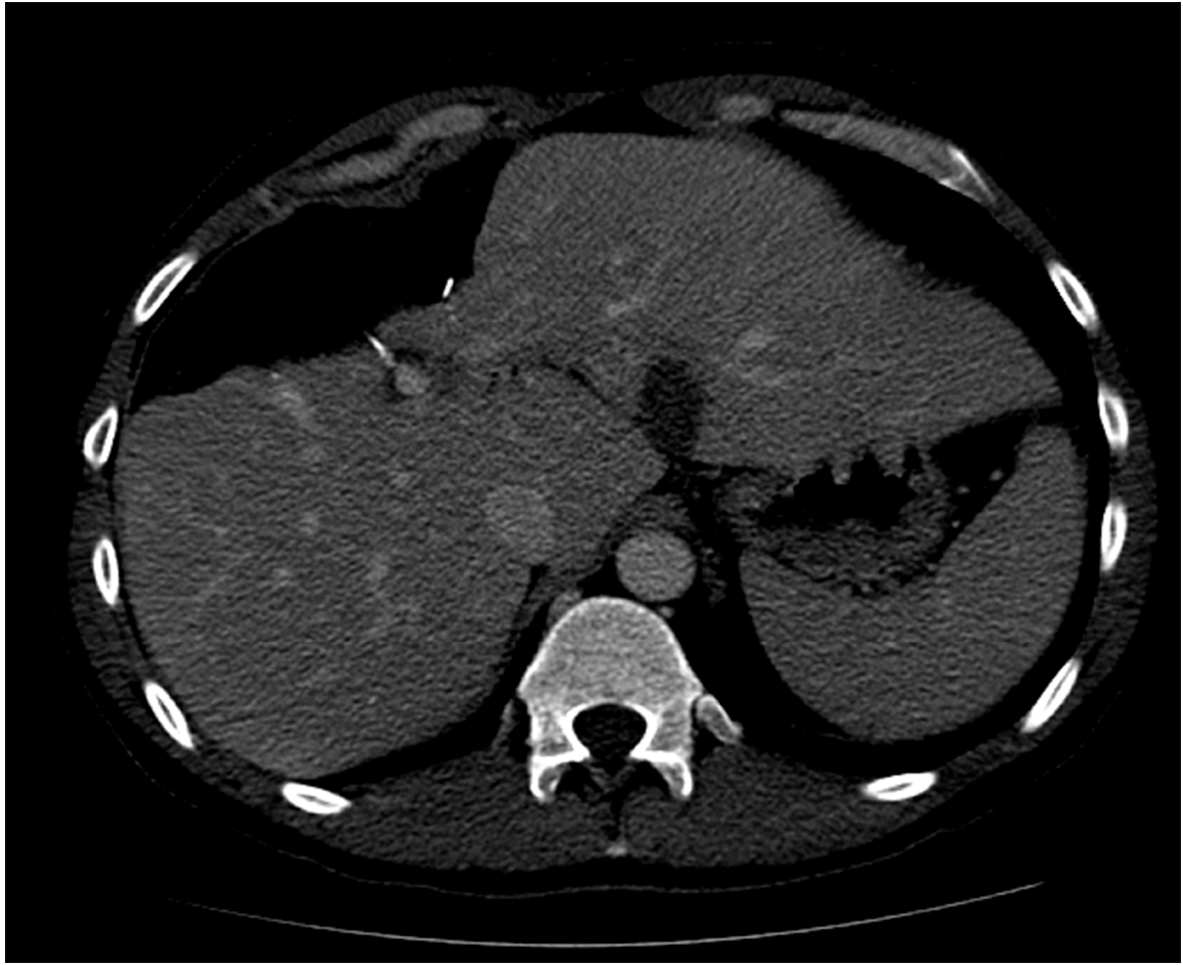

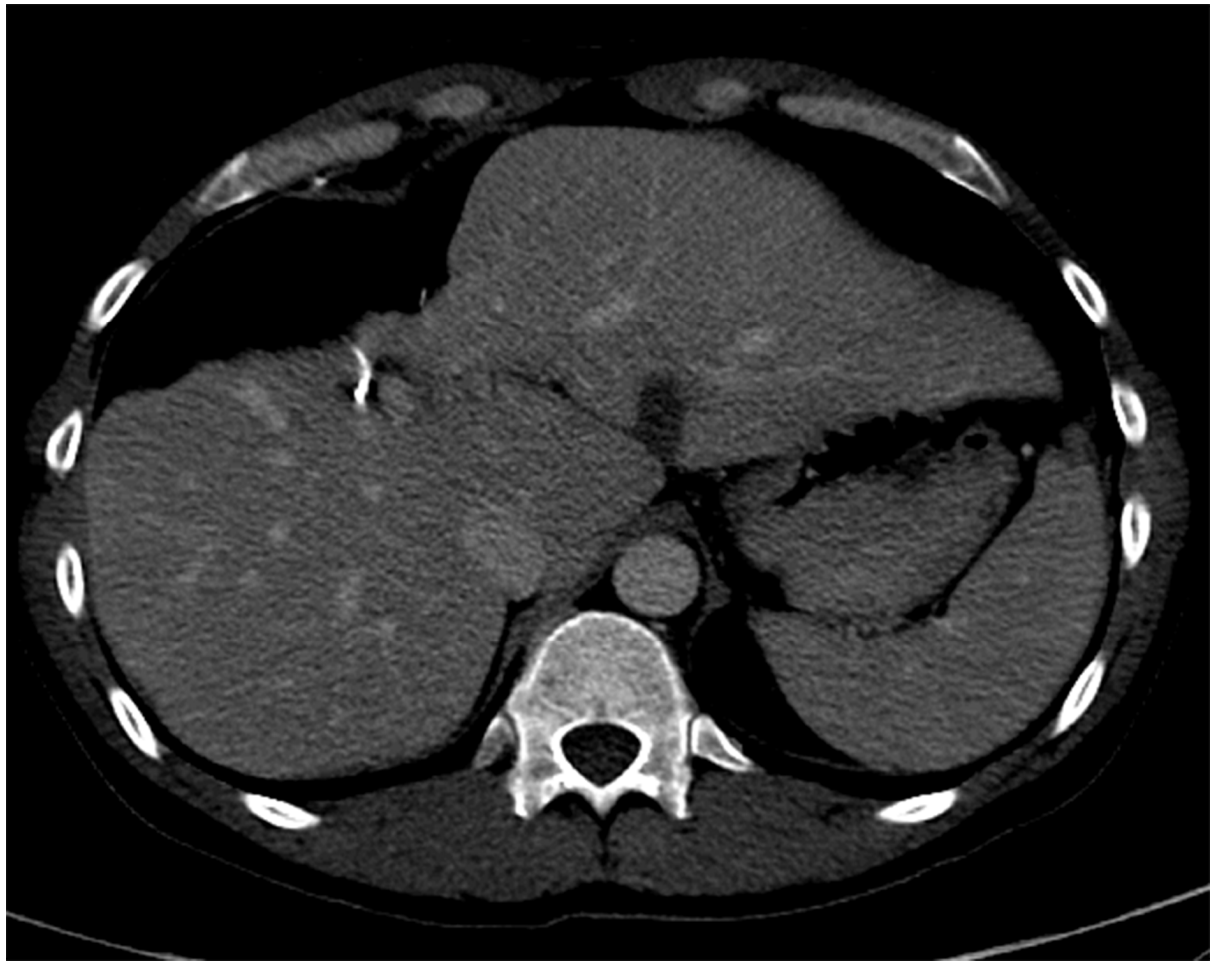

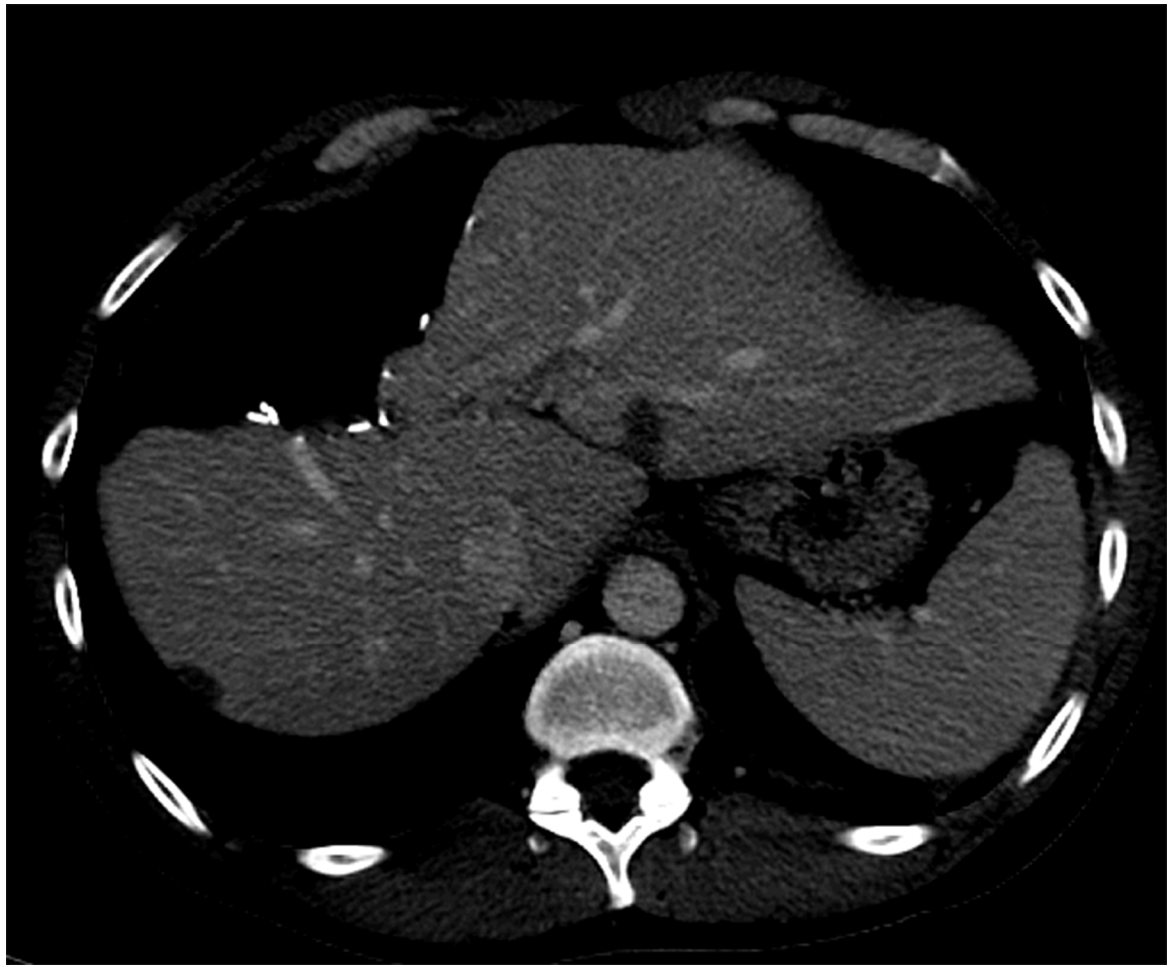

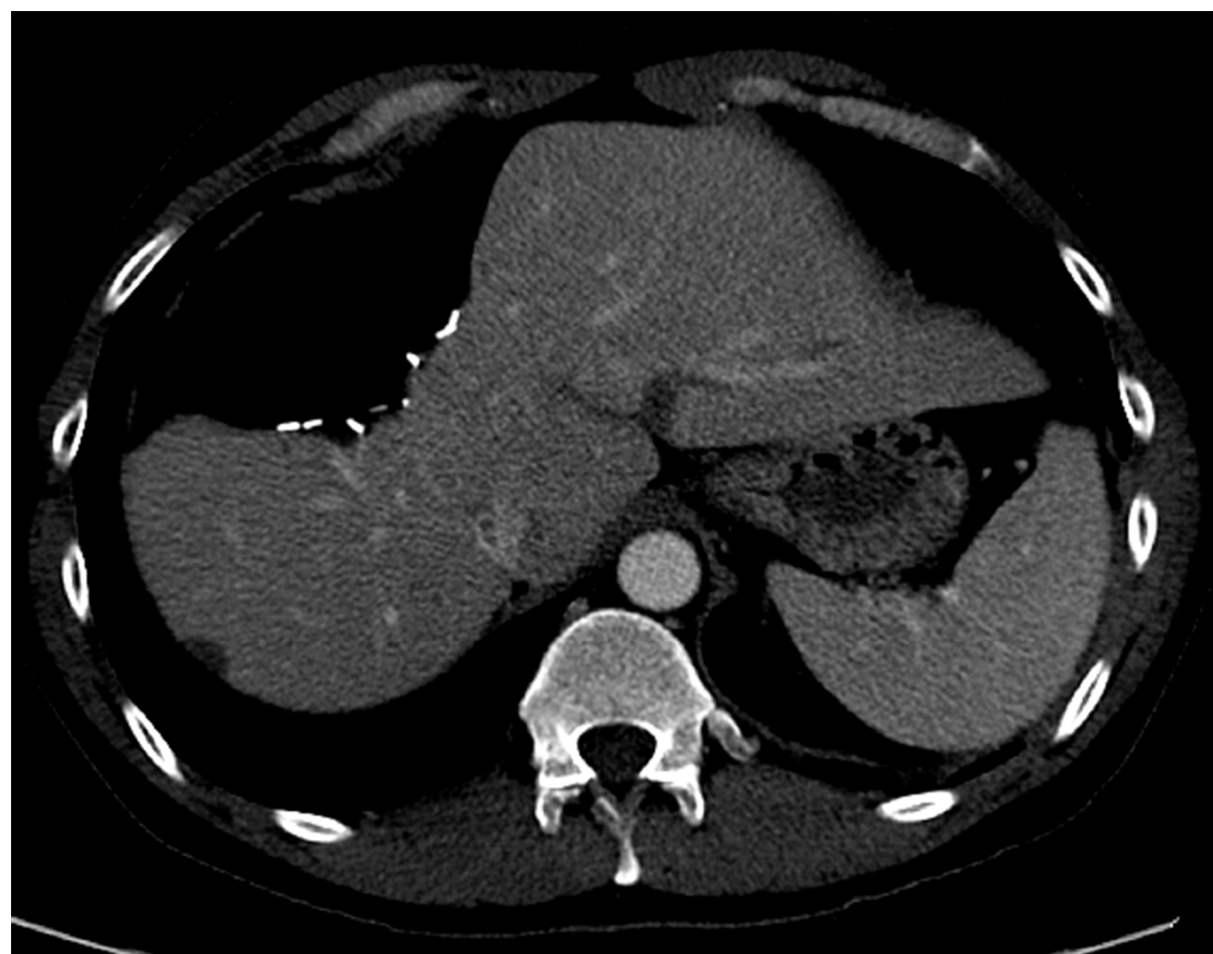

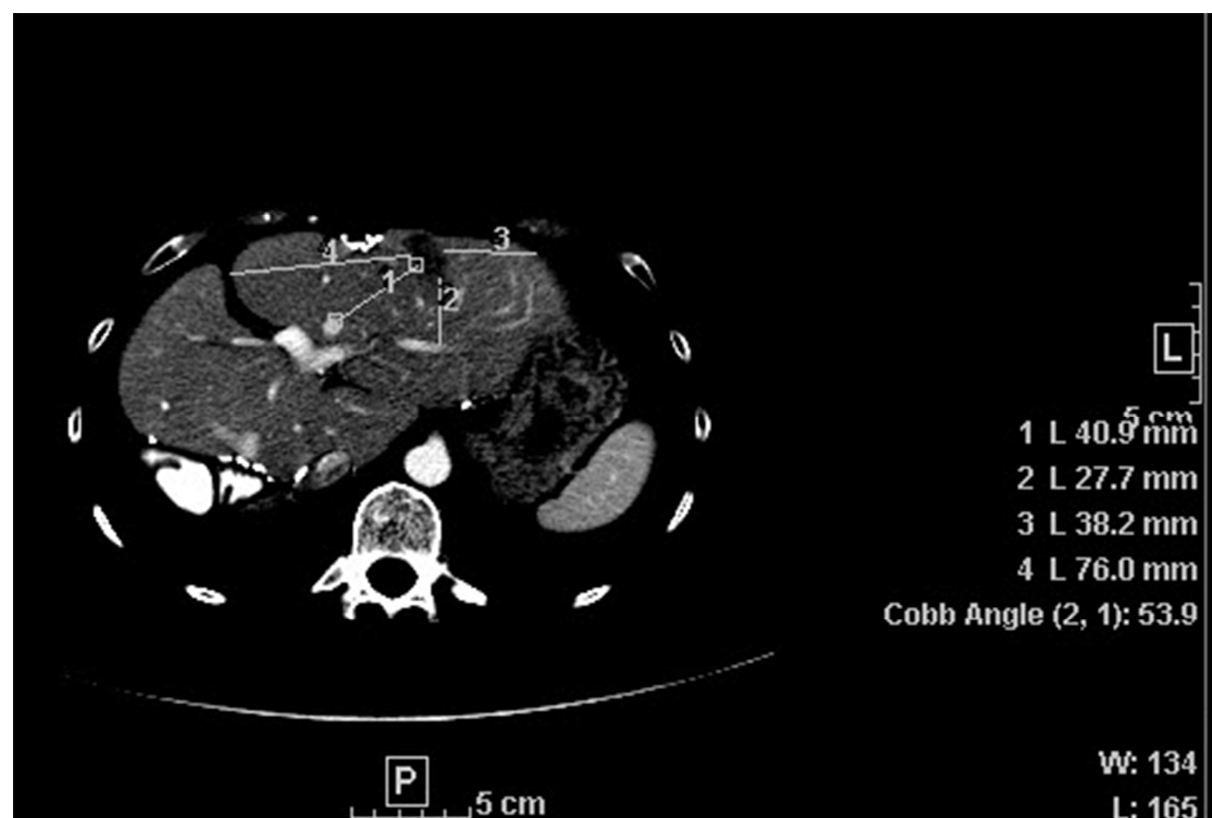



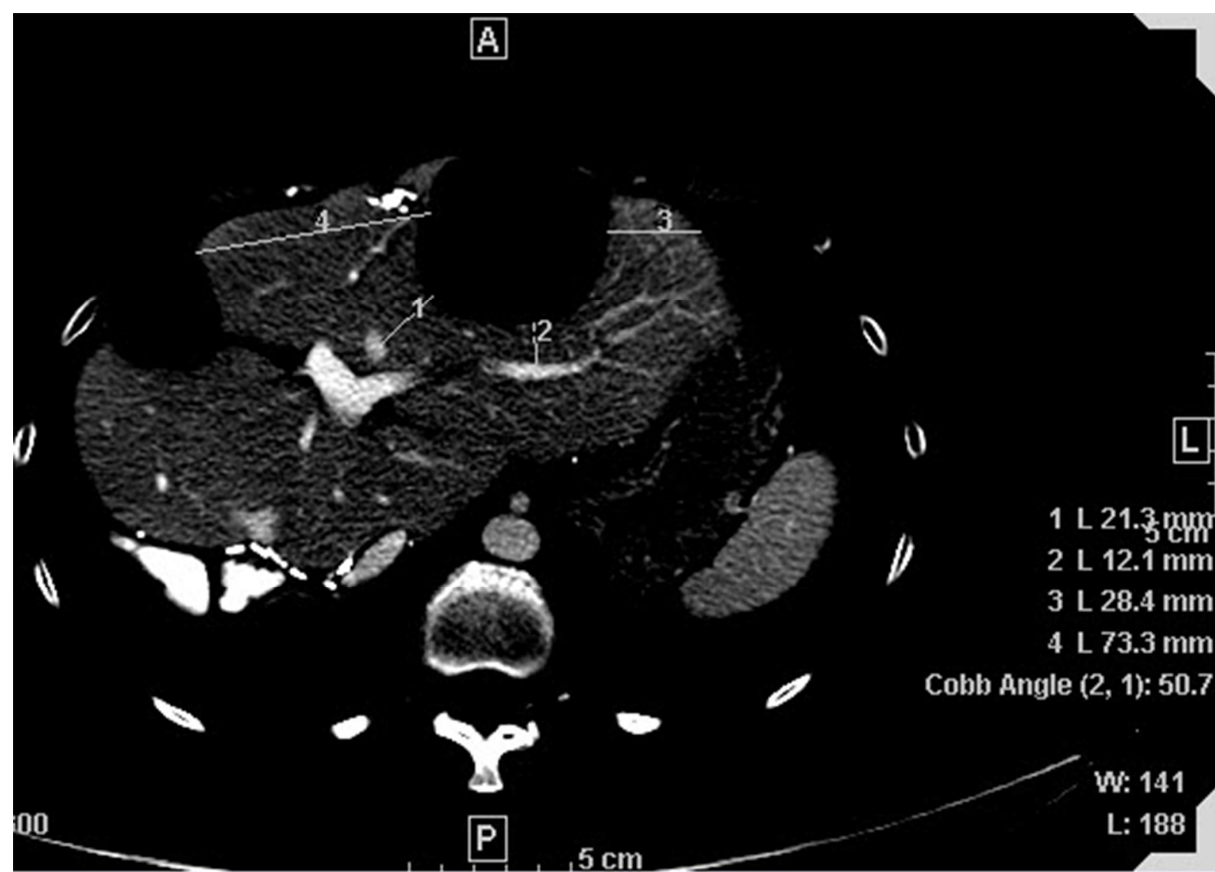

Supplement: NIHMS904224-supplement-supplement_1.pdf [file NIHMS904224-supplement-supplement_1.pdf]
